# Supplementary material for: Intracellular delivery of CII TA genes by polycationic liposomes for suppressed immune response of dendritic cells
Source: Royal Society of Chemistry journal article supplement (doi:10.1039/c5ra06720k), 2015-01-01
Supplement: c5ra06720k1.pdf [file c5ra06720k1.pdf]

1 Supporting Information

2

3 **Intracellular delivery of CII TA genes by polycationic**  
4 **liposomes for suppressed immune response of dendritic cells**

5 Lin Su<sup>a†</sup>, Gang Liu<sup>b†\*</sup>, Shuangnan Zhang<sup>a</sup>, Hanjie Wang<sup>a</sup>, Sheng Wang<sup>a</sup>,

6 Xue Li<sup>a</sup>, and Jin Chang<sup>ac\*</sup>

7 a School of Materials Science and Engineering , School of Life Sciences,

8 Tianjin University, 92 Weijin Road, Nankai District, Tianjin 300072, P.R.

9 China

10 b Department of General Surgery, Tianjin Medical University General

11 Hospital, 154 Anshan Road, Heping District, Tianjin 300052, P.R.China

12 c Collaborative Innovation Center of Chemical Science and Engineering

13 (Tianjin), Tianjin 300072, China

14

15

16

17

18

19 †These authors contributed equally to this paper.

20 \*Corresponding author. Tel: +86 022 87898212.

21 E-mail: jinchang@tju.edu.cn; lg1059@sina.com.

22

## 23 **1. Experiment section**

### 24 **1.1 Synthesis and characterization of OQLCS**

25 Firstly, Chitosan powder (0.11 g) was dissolved in 10 mL deionized water,  
26 followed by addition of 5 mL HCl (3 mol/L). After BOC-lysine, EDC, and DMF were  
27 successively added, the solution was under stirring. The reaction was performed at 25  
28 °C for 12 h. Then the butyloxycarbonyl groups (BOC) on the lysine was removed by  
29 adding tri-fluoroacetic acid (TFA) into the reaction system. Finally, the precipitate  
30 was washed twice with ethanol thrice, followed by dialyzing in water. The solution  
31 was lyophilized to get a light white powder.

32 LCS (5 g) was 100 mL of deionized water and mixed with QA (10g) within 50  
33 mL isopropanol. After 30 mL NaOH solution (42%, w/w) was added, the solution was  
34 performed at 80 °C for 24 h under stirring. Finally, the solution was dialyzed and  
35 lyophilized to get OQLCS white powder. The structure of the chitosan derivatives  
36 have been tested using FTIR spectra and <sup>1</sup>H NMR spectroscopy.

### 37 **1.2 Preparation of polymer liposomes**

38 The synthesized OQLCS was dissolved in 4 mL chloroform with cholesterol at  
39 room temperature (30 g for total lipids). The nanoliposomes structures were prepared  
40 by a gentle hydrophobic interaction. Briefly, OQLCS and Chol (mass ratio x) were  
41 dissolved in 4 ml chloroform at room temperature. Chloroform was then evaporated  
42 using a vacuum rotary evaporator, and a thin film of cationic polymer liposomes  
43 formed on the wall of a 50-ml round-bottled flask. Then the lipid film was dispersed  
44 in 10 ml distilled water and sonicated at room temperature for 10 min. Subsequently,

45 SPDP was added to the lipid solution to yield a 2-pyridyldithiol-end group on the  
46 liposomes' surface, followed by addition of TAT solution. The mixture was incubated  
47 overnight at 4 °C to a disulfide linkage between the surface of liposomes and TAT  
48 peptide. The morphology of the cationic polymer liposome was characterized by  
49 transmission electronic microscope. The average particle size and size distribution  
50 were determined by dynamic light scattering.

### 51 1.3 The preparation and characterization of the pCIITA/liposomes complex

52 After the redundant TAT removed, the pCIITA were incubated with the  
53 liposomes at different mass ratio (1:0,1:0.5,1:1,1:2,1:2.5,1:3,1:3.5), respectively. The  
54 complex with different mass ratio were detected and screened by agarose gel  
55 electrophoresis (AGE). The particle size and zeta potential was characterized by  
56 dynamic light scattering.

57

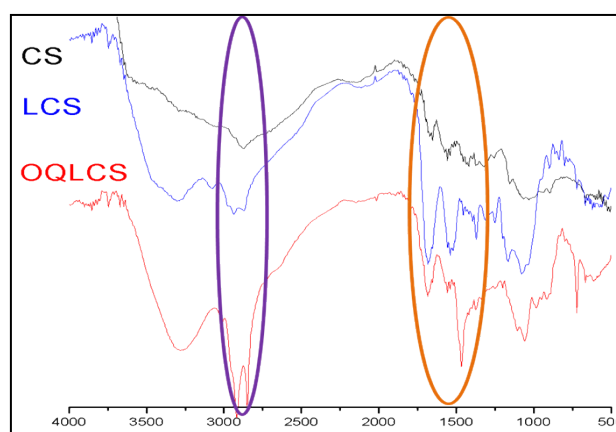

58

59

Fig. S1 The FT-TR spectra of CS, LCS and OQLCS.

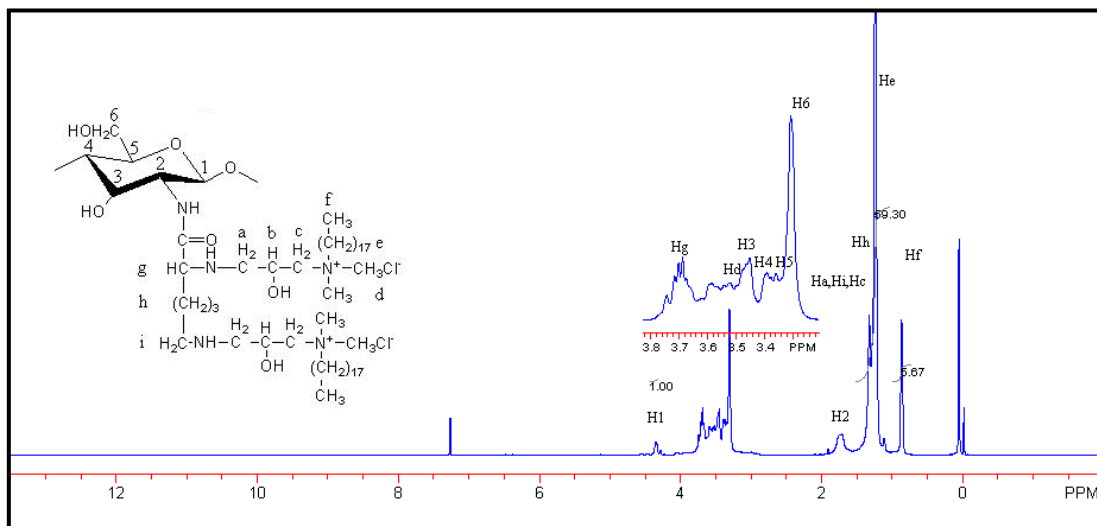

60

61

Fig. S2  $^1\text{H}$  NMR spectrum of OQLCS.

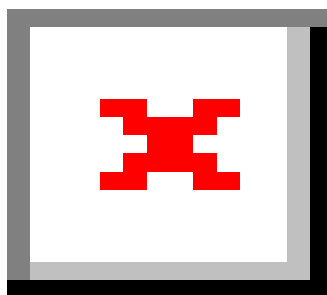

62

63 Fig. S3 Analysis of intracellular delivery efficiency by flow cytometry. Cells

64 transfected with a) blank, b) pCIITA, c) lipofectamine and d) pCIITA/liposomes

65

nanocomplexes.

66

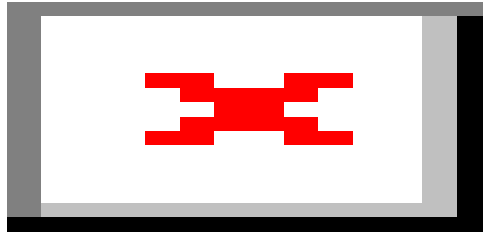

67

68 Fig. S4 Transcription level of genes a) CII TA mRNA and b) MHC II mRNA.

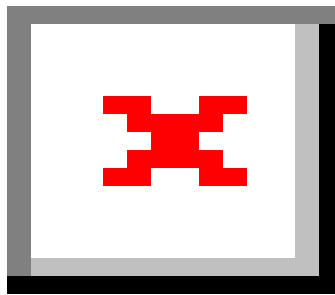

69

70 Fig. S5 Analysis of MHC II proteins expression by flow cytometry. Cells transfected

71 with a) blank, b) pCIITA, c) lipofectamine and d) pCIITA/liposomes nanocomplexes.

72
